# Supplementary material for: Molecular Identification of Staphylococcus aureus in Airway Samples from Children with Cystic Fibrosis
Source: PLoS One. 2016 Jan 25;11(1):e0147643. doi: 10.1371/journal.pone.0147643 (PMC4726467; doi:10.1371/journal.pone.0147643)
Supplement: S1 Table — (XLSX) [file pone.0147643.s001.xlsx]

## Sheet: Data
Sample	RA	RA_ed	_16S	_16S_ed	femA	femA_ed	type	Relative_abundance_Staph_noED	Relative_abundance_Staph_ED	p_16s	p_16s_ed	p_ra	p_ra_ed	p_femA	p_femA_ed	s_type	CFU_mL	Old_Extraction	New_Extraction
C01035	0	0.000100533	0	63.2	0	0	MRSA	0	0	0	1	0	1	0	0	OP	not available	0	4.76667
C01041	0	0.000837028	0	0	0	17.6	MRSA	0	0	0	0	0	1	0	1	OP	not available	0	5
C01122	0.000140193	0.000695943	0	84.3	2.74	44.4	MRSA	0.000140193	0.000140193	0	1	1	1	1	1	OP	not available	0	5.53333
C01126	5.36107e-05	0.000301853	0	0	0	0	MRSA	5.36107e-05	5.36107e-05	0	0	1	1	0	0	OP	not available	0.766667	5.73333
C01130	5.78838e-05	0.000424899	0	0	0	0	MRSA	5.78838e-05	5.78838e-05	0	0	1	1	0	0	OP	not available	0	5.26667
C01138	0	0.00010439	0	0	0	0	MRSA	0	0	0	0	0	1	0	0	OP	not available	0	4.96667
C01156	0	0	0	0	0	0	MRSA	0	0	0	0	0	0	0	0	OP	not available	0	5.46667
C01183	0.00147128	0.0112707	0	104	1.78	56.8	MRSA	0.00147128	0.00147128	0	1	1	1	1	1	OP	not available	0	5.1
C01213	4.07897e-05	0.000179469	0	18.5	0	19.5	MRSA	4.07897e-05	4.07897e-05	0	1	1	1	0	1	OP	not available	4.46667	8.5
C01219	0	0.000440176	0	0	0	21.5	MRSA	0	0	0	0	0	1	0	1	OP	not available	1.6	5.26667
C01258	6.29882e-05	0.000300808	0	0	0	0	MRSA	6.29882e-05	6.29882e-05	0	0	1	1	0	0	OP	not available	0	6.13333
C01262	0.000194087	0.00027894	0	0	0	0	MRSA	0.000194087	0.000194087	0	0	1	1	0	0	OP	not available	0	5.06667
C01284	0.000776575	0.00294768	61.9	274	4.89	475	MRSA	0.000776575	0.000776575	1	1	1	1	1	1	OP	not available	13	12.1
C01293	0.000578964	0.00367894	0	91.9	0	120	MSSA	0.000578964	0.000578964	0	1	1	1	0	1	OP	not available	0	5.4
C01297	0.000731076	0.0101363	0	107	0	46.3	MSSA	0.000731076	0.000674839	0	1	1	1	0	1	OP	not available	0	5
C01298	0.00039555	0.000457629	0	0	0	0	MSSA	0.00039555	0.00039555	0	0	1	1	0	0	OP	not available	3.03333	7.06667
C01299	8.78272e-05	0.000687663	0	11.8	0	0	MSSA	8.78272e-05	8.78272e-05	0	1	1	1	0	0	OP	not available	0	5.23333
C01302	8.36365e-05	0.000140292	0	0	0	0	MSSA	8.36365e-05	4.18183e-05	0	0	1	1	0	0	OP	not available	0	5.4
C01305	9.13826e-05	0.00568263	0	146	0	140	MSSA	9.13826e-05	9.13826e-05	0	1	1	1	0	1	OP	not available	0	6.06667
C01306	0	2.41109e-05	0	0	0	0	MSSA	0	0	0	0	0	1	0	0	OP	not available	0.533333	5.63333
C01307	0.000199614	0.0010165	0	0	0	19.1	MSSA	0.000199614	0.000199614	0	0	1	1	0	1	OP	not available	0	5.4
C01311	0	2.82454e-05	0	0	0	0	No SA	0	0	0	0	0	1	0	0	OP	not available	0	5.8
C01312	0.000678958	0.00184636	0	0	0	0	No SA	0.000678958	0.000678958	0	0	1	1	0	0	OP	not available	1	6.36667
C01313	0	0	0	0	0	0	No SA	0	0	0	0	0	0	0	0	OP	not available	0.933333	6.83333
C01314	5.56886e-05	5.52715e-05	0	0	0	0	No SA	5.56886e-05	5.56886e-05	0	0	1	1	0	0	OP	not available	0.433333	5.7
C01315	0.0217204	0.0391596	103.8	530	36.9	736	MSSA	0.0217204	0.0217204	1	1	1	1	1	1	OP	not available	0.466667	7.1
C01316	0.00113222	0.00162324	0	0	0	0	No SA	0.00113222	0.00113222	0	0	1	1	0	0	OP	not available	0.7	8.5
C01317	0.000497554	2.42266e-05	0	0	0	0	No SA	0.000497554	0.000497554	0	0	1	1	0	0	OP	not available	0.4	5.66667
C01318	0	0.000533258	0	31.8	0	0	MSSA	0	0	0	1	0	1	0	0	OP	not available	0.266667	6.26667
C01319	0.000122948	0.000308473	0	0	0	0	No SA	0.000122948	0.000122948	0	0	1	1	0	0	OP	not available	0.466667	6.1
C01320	0	5.83277e-05	0	0	0	0	No SA	0	0	0	0	0	1	0	0	OP	not available	0	6.16667
C01321	5.64175e-05	5.57631e-05	0	0	0	0	No SA	5.64175e-05	0	0	0	1	1	0	0	OP	not available	0	5.93333
C01322	0	2.63664e-05	0	0	0	0	MSSA	0	0	0	0	0	1	0	0	OP	not available	0	6.13333
C01323	0.0333896	0.142415	0	306	53.2	351	MSSA	0.0333896	0.0333896	0	1	1	1	1	1	OP	not available	1.03333	6.33333
C01324	0.000520833	0.000828964	0	0	0	0	No SA	0.000520833	0.000520833	0	0	1	1	0	0	OP	not available	0	6.03333
C01325	0.000172097	0.00215313	0	0	0	0	No SA	0.000172097	0.000172097	0	0	1	1	0	0	OP	not available	0	6.13333
C01326	0.00108907	0.00189668	0	65.4	16.5	47.5	MRSA	0.00108907	0.00108907	0	1	1	1	1	1	OP	not available	0	4.9
C01327	0.000101911	0.000430802	0	0	0	9.68	MSSA	0.000101911	0.000101911	0	0	1	1	0	1	OP	not available	0	4.36667
C01328	0.000600962	0.000694613	0	0	0	0	No SA	0.000600962	0.000333868	0	0	1	1	0	0	OP	not available	0	5.13333
C01329	0.00134245	0.00113496	0	0	0	0	No SA	0.00134245	0.00134245	0	0	1	1	0	0	OP	not available	0	4.96667
C01330	0.000526343	0.000285063	0	0	0	0	No SA	0.000526343	0.000526343	0	0	1	1	0	0	OP	not available	0	4.9
C01331	0.000107951	7.61074e-05	0	0	0	0	MSSA	0.000107951	0.000107951	0	0	1	1	0	0	OP	not available	0.133333	5.26667
E00688	0.0223386	0.0198924	1133	421	1752	639	MRSA	.	.	1	1	1	1	1	1	ES	100000	10.9667	8.73333
E00690	0.000144865	0.000459438	0	0	0	0	MRSA	.	.	0	0	1	1	0	0	ES	45000	69.3	37.6
E00695	0	0.000220938	0	0	0	0	MRSA	.	.	0	0	0	1	0	0	ES	3000	13.5333	34.1
E00707	0.000453926	0.00119065	0	14.2	0	36.5	MRSA	.	.	0	1	1	1	0	1	ES	100000	9.4	9.36667
E00708	0.34592	0.721234	546.5	1101	680	1351	MRSA	.	.	1	1	1	1	1	1	ES	100000	60.2333	54.4
E00710	0.438338	0.846081	2954	3645	1974	8217	MRSA	.	.	1	1	1	1	1	1	ES	900000000	6.43333	6.9
E00719	0.893602	0.974677	4103.67	2389	5493	9020	MRSA	.	.	1	1	1	1	1	1	ES	100000	34.5333	29
E00724	0.16717	0.321978	0	465	93.8	533	MRSA	.	.	0	1	1	1	1	1	ES	.	11.7	11.2333
E00731	0.00489495	0.0822181	0	2315	168	1717	MRSA	.	.	0	1	1	1	1	1	ES	11000000	54.8667	67.8667
E00739	0.00200697	0.00349255	0	166	66.7	135	MSSA	.	.	0	1	1	1	1	1	ES	1000000	28.9	18.9333
E00745	0.314314	0.963012	1603.33	248	2141	3493	MSSA	.	.	1	1	1	1	1	1	ES	30000000	92	43.0333
E00752	0.000366771	0.000415312	0	0	10.6	12.1	MRSA	.	.	0	0	1	1	1	1	ES	36000	20.2333	14.7667
E00753	0.259961	0.114371	4151.33	332	3121	228	MSSA	.	.	1	1	1	1	1	1	ES	120000000	39.1333	15.3
E00759	0.000574653	0.00124952	0	0	0	0	No SA	.	.	0	0	1	1	0	0	ES	0	0.933333	4.93333
E00760	0.160595	0.294079	1855	1005	2258	1634	MRSA	.	.	1	1	1	1	1	1	ES	200000000	34.4667	18.7
E00761	0.0147962	0.0725433	440.667	1470	441	1799	MRSA	.	.	1	1	1	1	1	1	ES	110000000	72.1	45.7
E00762	0.673579	0.866707	1272	616	1007	606	MSSA	.	.	1	1	1	1	1	1	ES	300000000	78.8333	83.1333
E00763	0.000261178	0.000486594	0	0	0	0	No SA	.	.	0	0	1	1	0	0	ES	0	0	4.73333
E00764	0.00619702	0.0139239	0	0	0	0	MSSA	.	.	0	0	1	1	0	0	ES	6000	9.9	9.4
E00765	0	.	0	.	0	.	No SA	.	.	0	.	0	.	0	.	ES	0	6.33333	.
E00766	0.883358	0.98541	9193.67	6105	10060	5697	MSSA	.	.	1	1	1	1	1	1	ES	100000	87.3	57.7333
E00767	0.659613	.	819.333	.	1517	.	MSSA	.	.	1	.	1	.	1	.	ES	300000000	80.3	.
E00768	0.000108114	0.000122044	0	0	0	0	No SA	.	.	0	0	1	1	0	0	ES	0	30.7333	23.5333
E00769	0.0108257	0.0131197	0	20.7	65.8	69.9	MSSA	.	.	0	1	1	1	1	1	ES	0	0.733333	4.53333
E00770	0.000662866	0.00338906	0	0	0	0	No SA	.	.	0	0	1	1	0	0	ES	0	1.56667	4.6
E00771	0.000650364	0.00149477	0	0	0	0	No SA	.	.	0	0	1	1	0	0	ES	0	25.7333	13.4
E00772	0	3.70412e-05	0	0	0	0	No SA	.	.	0	0	0	1	0	0	ES	0	2.56667	6.96667
E00773	0.000141263	0.0004	0	0	0	0	No SA	.	.	0	0	1	1	0	0	ES	0	6.43333	5.3
E00774	0.41454	0.879214	1331.33	2095	1985	4084	MSSA	.	.	1	1	1	1	1	1	ES	100000	51.5333	35.8667
E00775	0.643615	0.975427	474.333	10988	997	33140	MSSA	.	.	1	1	1	1	1	1	ES	100000000	55.4667	94.4333
E00776	0.807362	.	644.667	.	1057	.	MSSA	.	.	1	.	1	.	1	.	ES	100000	48.5667	.
E00777	0.000195236	0.00038883	0	0	0	0	No SA	.	.	0	0	1	1	0	0	ES	0	1.2	4.46667
E00778	0.739452	0.979916	0	2189	660	11432	MSSA	.	.	0	1	1	1	1	1	ES	100000	68.5667	107.833
E00779	0.719954	0.871226	28794	6225	38572	14967	MSSA	.	.	1	1	1	1	1	1	ES	10000000	99.3333	87.7333
E00780	0.90311	0.967377	6055	1257	7705	5661	MRSA	.	.	1	1	1	1	1	1	ES	45000000	38.5667	15.4667
E00781	0.000183284	9.90622e-05	0	0	0	0	No SA	.	.	0	0	1	1	0	0	ES	0	9.1	11.1
E00782	0.493374	0.787671	338.667	183	813	797	MSSA	.	.	1	1	1	1	1	1	ES	2000000	20.9667	10.6333
E00783	0.000491793	0.00150329	0	0	0	0	No SA	.	.	0	0	1	1	0	0	ES	0	2.93333	5.66667
E00784	0	.	0	.	0	.	No SA	.	.	0	.	0	.	0	.	ES	0	3.56667	.
E00785	0.01789	0.071161	0	96.7	85.6	138	MRSA	.	.	0	1	1	1	1	1	ES	10000000	26.4	23.5
E00786	0.974443	.	7677	.	4404	.	MRSA	.	.	1	.	1	.	1	.	ES	19000000	15.3	.
E00787	0.00304282	0.00158535	0	0	0	0	No SA	.	.	0	0	1	1	0	0	ES	0	18.9333	31.3667
E00788	4.32059e-05	0.000163628	0	0	0	0	MSSA	.	.	0	0	1	1	0	0	ES	1000	0.933333	4.9
E00789	0.00156337	0.00529532	0	0	0	0	MSSA	.	.	0	0	1	1	0	0	ES	5000	34	18.7
E00790	6.58935e-05	0	0	0	0	0	No SA	.	.	0	0	1	0	0	0	ES	0	3.63333	5.56667

## Sheet: Data Definitions
Sample	sample ID
RA	relative abundance of sta by sequencing no ED
RA_ed	relative abundance of sta by sequencing with ED
_16S	quantitative amount of sta by 16s no ED
_16S_ed	quantitative amount of sta by 16s with ED
femA	quantitative amount of sta by femA qpcr no ED
femA_ed	quantitative amount of sta by femA qpcr with ED
type	sample Staph classification by culture
Relative_abundance_Staph_noED	Relative abundance of Staphylococcus without enzymatic digestion prior to extraction
Relative_abundance_Staph_ED	Relative abundance of Staphylococcus with enzymatic digestion prior to extraction
p_16s	presence of sta by 16s qpcr no ED
p_16s_ed	presence of sta by 16s qpcr with ED
p_ra	presence of sta by sequencing no ED
p_ra_ed	presence of sta by sequencing with ED
p_femA	presence of sta by femA qpcr no ED
p_femA_ed	presence of sta by femA qpcr with ED
s_type	sample type (OP, ES)
CFU_mL	quantitative culture result (sputum only)
Old_Extraction	total bacterial load without enzymatic digestion prior to extraction
New_Extraction	total bacterial load with enzymatic digestion prior to extraction
